# Supplementary material for: Cholecystokinin-B Receptor-Targeted Nanoparticle for Imaging and Detection of Precancerous Lesions in the Pancreas
Source: MDPI journal article supplement (doi:10.3390/biom11121766), 2021-11-25
Supplement: s1 [file s1]

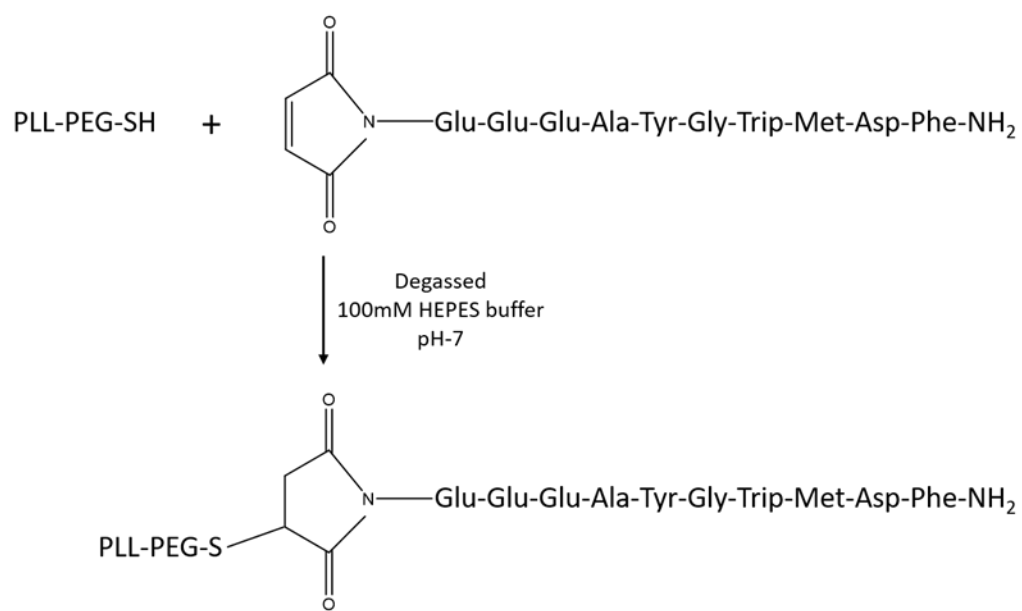

**Figure S1.** Thiol-maleimide reaction. Maleimide functionalized gastrin-10 peptide reacts with thiol group of the polymer and forms a stable thioether bond. From pH 6.5 to 7.5, the thiol-maleimide reaction is chemoselective for thiols. At pH 7.0, the reaction rate of thiol with maleimide is about 1000 times faster than the reaction rate for amines with maleimide.

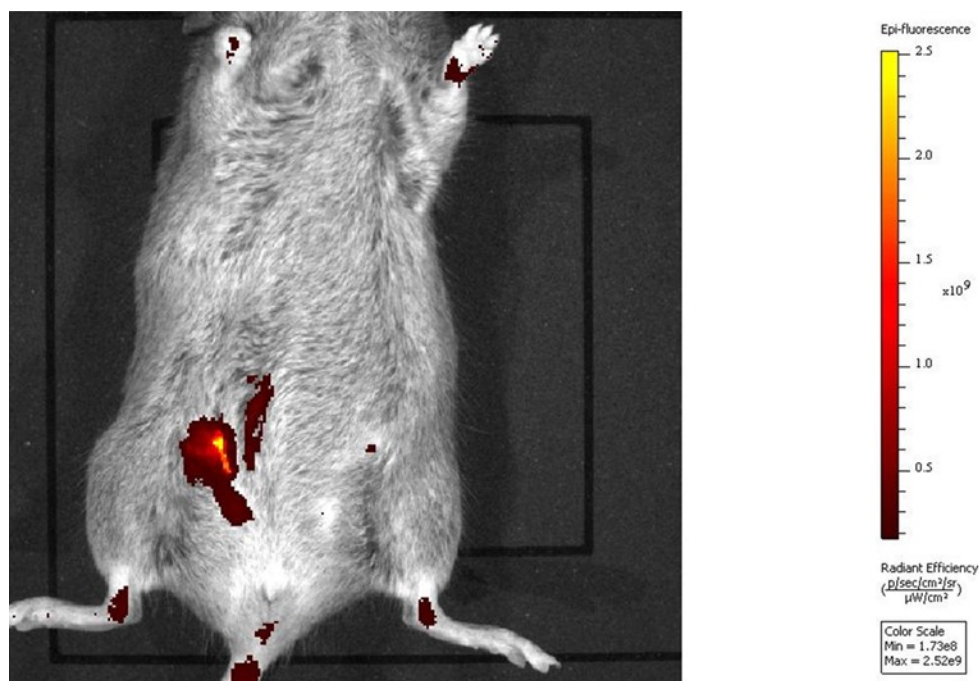

**Figure S2.** *In vivo* imaging of a KC mouse after injection with untargeted NPs. Five month old KC mouse injected with untargeted NPs shows no specific fluorescence in the mouse pancreas after 5 hours in IVIS imaging machine and some residual NP at the site of IP injection.

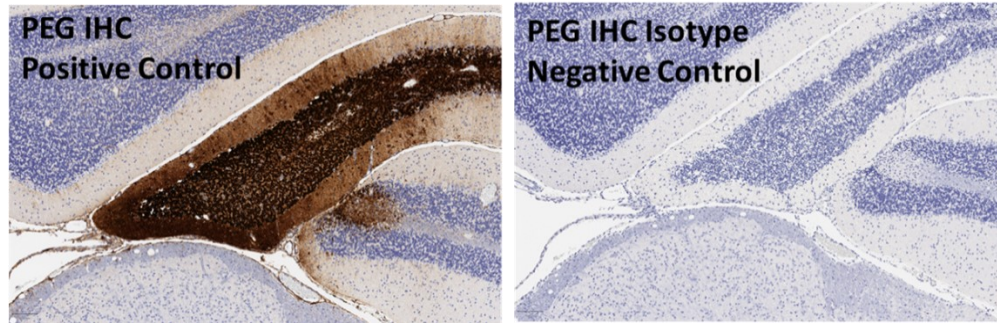

**Figure S3.** Immunohistochemistry controls. Immunohistochemistry positive (left) and negative (right) controls for PEG are shown.

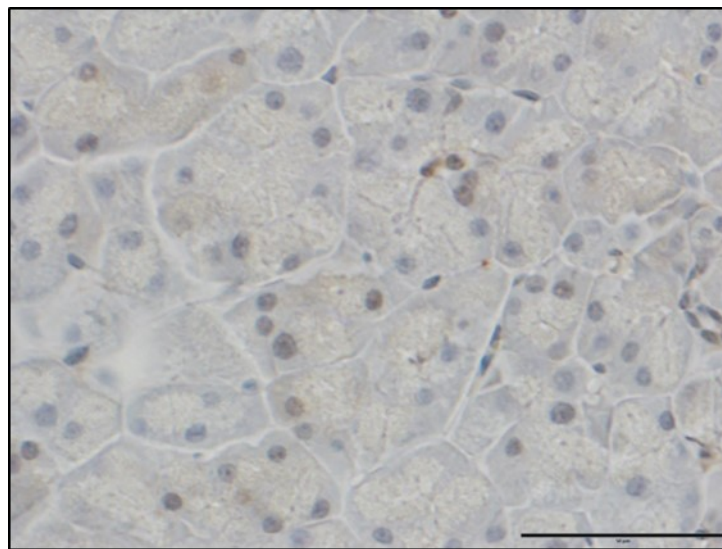

**Figure S4.** Negative control mouse pancreas immunohistochemistry. Wild-type C57BL/6 mice were injected with targeted fluorescent polyplex nanoparticles and the pancreas excised and reacted by with anti-Alexa488. No significant immunoreactivity was identified. Bar = 200 $\mu$ m.
